# Supplementary material for: Nonenzymatic release of N7-methylguanine channels repair of abasic sites into an AP endonuclease-independent pathway in Arabidopsis
Source: PubMed Central journal article supplement — Proc Natl Acad Sci U S A. 2018 Jan 16;115(5):E916–24. doi: 10.1073/pnas.1719497115 (PMC5798382; doi:10.1073/pnas.1719497115), 2018-01-16
Supplement: pnas.201719497SI.pdf [file pnas.201719497SI.pdf]

# Supporting Information

Barbado et al. 10.1073/pnas.1719497115

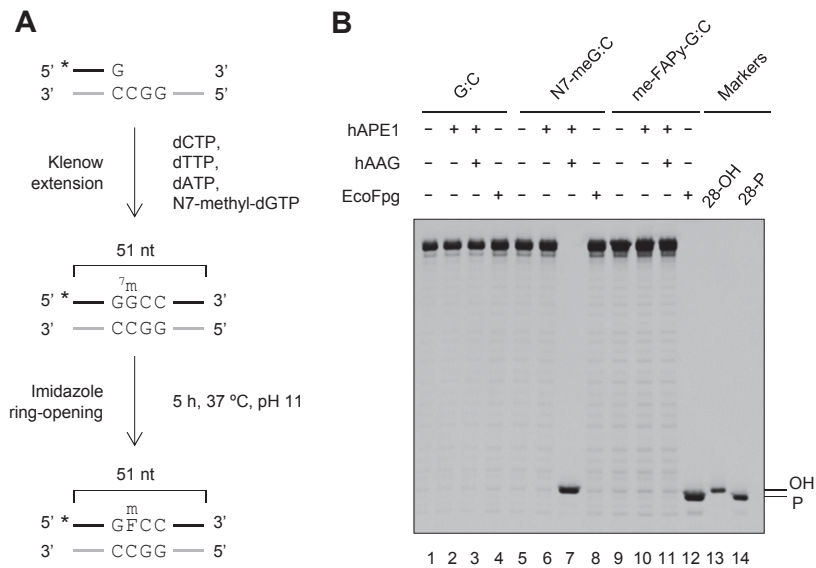

**Fig. S1.** Generation and characterization of DNA substrates containing N7-meG or me-FAPy-G. (A) Scheme of DNA substrate synthesis. A 5'-fluorescein-labeled 28-nt primer annealed to a 51-nt oligonucleotide was extended by *E. coli* DNA polymerase I (Klenow fragment 3'-5' exonuclease-free) in the presence of dATP, dCTP, dTTP, and 7-methyl-dGTP for 1 h at 37 °C. The N7-meG was converted to the imidazole ring-opened form me-FAPy-G by incubation for 5 h at 37 °C in alkaline buffer (pH 11). (B) Validation of DNA substrates. DNA duplexes (20 nM) containing a 5'-end-labeled strand with a single N7-meG or me-FAPy-G opposite C were incubated with human APE1 (1 U), human AAG (2 U), or *E. coli* Fpg (8 U) at 37 °C for 8 h. Reaction products were separated by denaturing PAGE and detected by fluorescence scanning. Asterisks represent the fluorescent label.

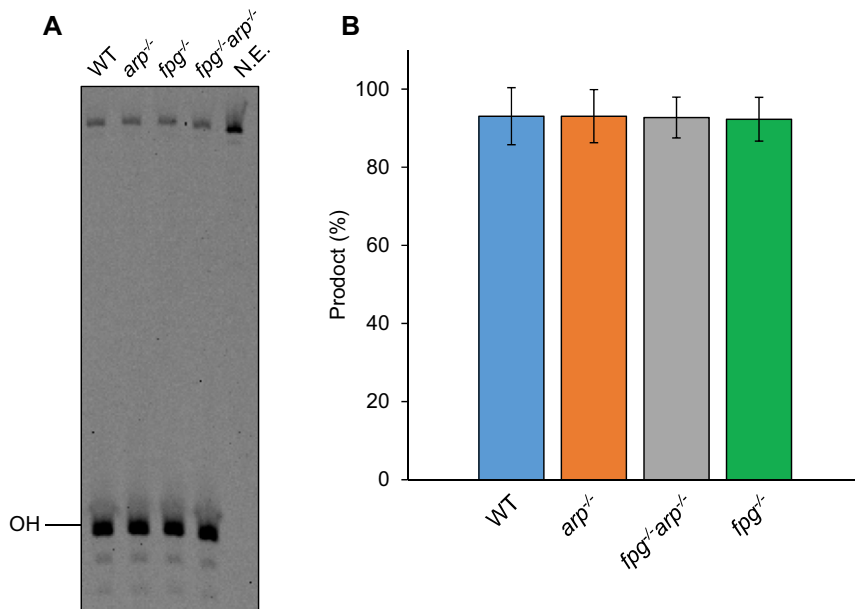

**Fig. S2.** Uracil DNA glycosylase activity of *Arabidopsis* cell-free extracts. Double-stranded oligonucleotide substrates (20 nM) containing a single U:C mismatch were incubated with WT, *fpg*<sup>-/-</sup>, *arp*<sup>-/-</sup>, or *fpg*<sup>-/-</sup> *arp*<sup>-/-</sup> *Arabidopsis* cell-free extracts (8 μg) for 3 h at 37 °C. Then, hAPE1 (10 U) and MgCl<sub>2</sub> (2 mM) were added and incubation continued for 1 h. Reaction products were separated by denaturing PAGE and detected by fluorescence scanning (A). Values shown in the graph (B) are means with SEs from three independent experiments. N.E., nonextract.

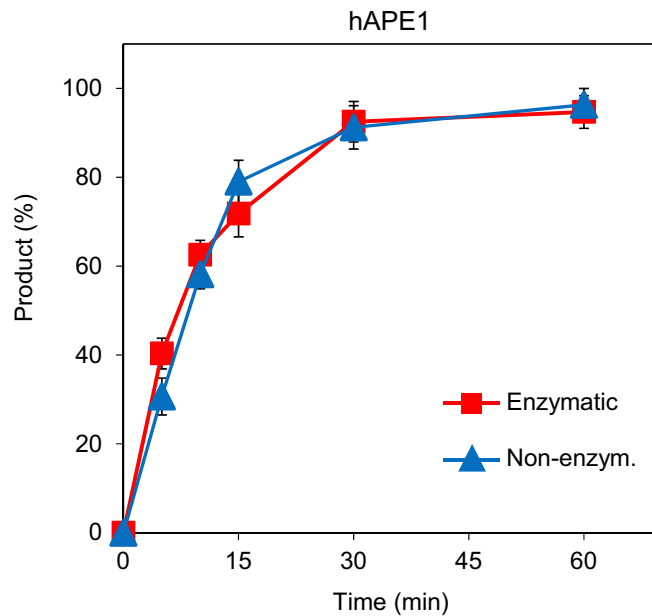

**Fig. 53.** Activity of hAPE1 on AP sites generated by enzymatic and nonenzymatic release of N7-meG. DNA substrates (20 nM) were a 9:1 mixture of homoduplex G:C and heteroduplex AP:C generated either by spontaneous N7-meG depurination (nonenzymatic, blue triangles) or N7-meG excision by hAAG (enzymatic, red squares). Substrates were incubated with hAPE1 (0.01 U) in the presence of 2 mM  $\text{MgCl}_2$ . Reaction products were separated by denaturing PAGE and detected by fluorescence scanning. Values are means with SEs from three independent experiments.

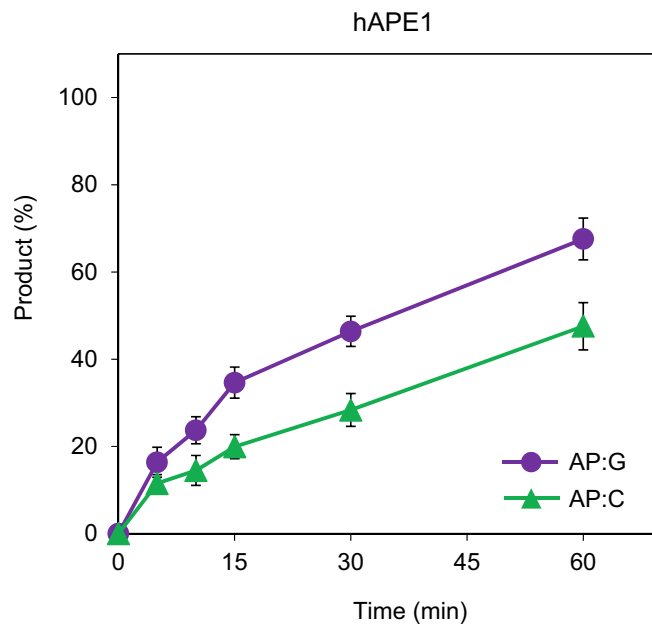

**Fig. 54.** Activity of hAPE1 on enzymatically generated AP sites opposite C or G. DNA substrates (2 nM) contained either a single AP:G (purple circles) or AP:C (green triangles), both generated by uracil excision. Substrates were incubated with hAPE1 (0.01 U) in the presence of 2 mM  $\text{MgCl}_2$ . Reaction products were separated by denaturing PAGE and detected by fluorescence scanning. Values are means with SEs from three independent experiments.

**Table S1. DNA sequence of oligonucleotides used as primers**

| Name   | DNA sequence 5'-3'                  |
|--------|-------------------------------------|
| FPG_F1 | AACGAAGCAATAAAAGGCGC                |
| FPG_R5 | CCACTCCTCTGAGTCCTTTACAGC            |
| ARP_F1 | GAAGTTATCTCAACTTTACGAC              |
| ARP_R1 | GCTCTCAAACCTCAACAATCC               |
| LBa1   | TGGTTCACGTAGTGGGCCATCG              |
| ZDP_F1 | AATGAATCCAACATTGATCGATGGAAG         |
| ZDP_R1 | ATACAGCTAAGTCCCTGGCGATGACTT         |
| LB3    | TAGCATCTGAATTTCCATAACCAATCTCGATACAC |

**Table S2. DNA sequence of oligonucleotides used as substrates**

| Name        | DNA sequence 5'-3'                                   | Strand |
|-------------|------------------------------------------------------|--------|
| FI-28G      | TCACGGGATCAATGTGTTCTTTTCAGCTG                        | Upper  |
| GGCCRnoC    | GGTATTGATGGTGAGAGTGAGGCCAGCTGAAAGAACACATTGATCCCGTGA  | Lower  |
| FI-GUCCRnoC | TCACGGGATCAATGTGTTCTTTTCAGCTGUCCTCACTCTCACCATCAATACC | Upper  |
| GGGCRnoC    | GGTATTGATGGTGAGAGTGAGGCCAGCTGAAAGAACACATTGATCCCGTGA  | Lower  |
| FI-GGCC     | TCACGGGATCAATGTGTTCTTTTCAGCTGGCCTCACGCTGACCAGGAATACC | Upper  |
| GGCC        | GGTATTCTGGTCAGCGTGAGGCCAGCTGAAAGAACACATTGATCCCGTGA   | Lower  |
